# Supplementary material for: Dexamethasone for the Treatment of Tuberculous Meningitis in Adolescents and Adults
Source: Atypon-hosted journal article supplement (doi:10.1056/nejmoa040573), 2004-10-20
Supplement: 1741sa1.pdf [file 1741sa1.pdf]

## Supplementary Appendix

This appendix has been provided by the authors to give readers additional information about their work.

Supplement to: Thwaites GE, Bang ND, Dung NH, et al. Dexamethasone for the treatment of tuberculous meningitis in adolescents and adults. *N Engl J Med* 2004;351:1741-51.

| Table 1. Baseline Characteristics of Study Population.*       |                                 |                  |                           |                  |
|---------------------------------------------------------------|---------------------------------|------------------|---------------------------|------------------|
| Variable                                                      | Allocated Dexamethasone (N=274) |                  | Allocated Placebo (N=271) |                  |
|                                                               | N or Median                     | Percent or Range | N or Median               | Percent or Range |
| Recruited in HTD                                              | 48                              | 17.5%            | 45                        | 16.6%            |
| Recruited in PNT hospital for tuberculosis                    | 226                             | 82.5%            | 226                       | 83.4%            |
| Age distribution (yr)                                         |                                 |                  |                           |                  |
| 15 to 17                                                      | 12                              | 4.4%             | 11                        | 4.1%             |
| 18 to 30                                                      | 93                              | 33.9%            | 96                        | 35.4%            |
| 31 to 50                                                      | 94                              | 34.3%            | 96                        | 35.4%            |
| 51 to 65                                                      | 40                              | 14.6%            | 34                        | 12.5%            |
| >65                                                           | 35                              | 12.8%            | 34                        | 12.5%            |
| Definite diagnosis†                                           | 98                              | 35.8%            | 89                        | 32.8%            |
| Smear positive, culture negative                              | 16                              | 5.8%             | 5                         | 1.8%             |
| Smear positive, culture positive                              | 22                              | 8.0%             | 22                        | 8.1%             |
| Smear negative, culture positive                              | 60                              | 22.0%            | 62                        | 22.9%            |
| Previous tuberculosis treatment                               | 22                              | 8.5%             | 25                        | 9.9%             |
| Temperature (°C)                                              | 38.0                            | 37.0–40.6        | 38.0                      | 36.8–41.0        |
| Extrapulmonary/neural tuberculosis                            | 58                              | 21.2%            | 56                        | 20.7%            |
| Chest radiography                                             |                                 |                  |                           |                  |
| Active nonmiliary tuberculosis                                | 110                             | 40.1%            | 104                       | 38.4%            |
| Miliary tuberculosis                                          | 75                              | 27.4%            | 80                        | 29.5%            |
| Investigations                                                |                                 |                  |                           |                  |
| Hematocrit (%)                                                | 36.1                            | 17.6–53.6        | 36.7                      | 9.0–66.4         |
| Blood leucocyte count (×10 <sup>6</sup> /ml)                  | 10100                           | 2490–26300       | 10200                     | 1050–39200       |
| Plasma sodium (mmol/l)                                        | 131                             | 102–152          | 130                       | 107–155          |
| Hepatitis B surface antigenaemia                              | 30                              | 11.8%            | 30                        | 12.3%            |
| Aspartate aminotransaminase (U/ml)                            | 32                              | 10–191           | 30                        | 3–1145           |
| Alanine aminotransferase (U/ml)                               | 35                              | 10–763           | 30                        | 28–1001          |
| Cerebrospinal fluid                                           |                                 |                  |                           |                  |
| Opening pressure (cm H <sub>2</sub> O)                        | 23                              | 4–41             | 21                        | 2–41             |
| Leucocyte count (×10 <sup>3</sup> /ml)                        | 117                             | 1–1880           | 111                       | 1–3990           |
| Percentage neutrophils                                        | 10                              | 0–96             | 10                        | 0–96             |
| Percentage lymphocytes                                        | 90                              | 4–100            | 90                        | 4–100            |
| Protein (mg/dl)                                               | 156                             | 10–3000          | 133                       | 12–4700          |
| Cerebrospinal fluid:plasma glucose                            | 0.29                            | 0.04–0.78        | 0.29                      | 0.02–0.96        |
| Lactate (mmol/l)                                              | 5.7                             | 1.5–12.1         | 5.1                       | 1.9–9.4          |
| Treatment                                                     |                                 |                  |                           |                  |
| Mannitol given                                                | 100                             | 36.5%            | 99                        | 36.8%            |
| Initial antituberculosis regimen                              |                                 |                  |                           |                  |
| Rifampicin, isoniazid, pyrazinamide, streptomycin             | 203                             | 74.1%            | 196                       | 72.9%            |
| Rifampicin, isoniazid, pyrazinamide, ethambutol               | 46                              | 16.8%            | 52                        | 19.3%            |
| Rifampicin, isoniazid, pyrazinamide, ethambutol, streptomycin | 23                              | 8.4%             | 20                        | 7.4%             |
| Isoniazid, pyrazinamide, ethambutol                           | 1                               | 0.4%             | 1                         | 0.4%             |
| Streptomycin, ethambutol                                      | 1                               | 0.4%             | 0                         |                  |
| Initial doses of regimen (mg/kg)                              |                                 |                  |                           |                  |
| Rifampicin                                                    | 9.4                             | 6.0–13.3         | 9.4                       | 3.6–15.0         |
| Isoniazid                                                     | 6.0                             | 4.0–8.1          | 6.0                       | 2.4–10.0         |
| Pyrazinamide                                                  | 26.3                            | 12.5–26.3        | 26.6                      | 3.6–45.5         |
| Streptomycin                                                  | 16.7                            | 7.5–26.3         | 16.7                      | 6.7–33.3         |
| Ethambutol                                                    | 18.6                            | 10.0–25.8        | 20.0                      | 13.8–40.0        |

\* Missing observations change the denominator in each treatment group (dexamethasone, placebo) for the following variables: hematocrit (261,264), blood leucocyte count (263,266), plasma sodium (234,239), aspartate aminotransaminase (222,217), alanine aminotransferase (222,217), cerebrospinal fluid opening pressure (104,121), cerebrospinal fluid leucocyte count (273,269), cerebrospinal fluid percentage neutrophils (272,268), cerebrospinal fluid percentage lymphocytes (272,268), cerebrospinal fluid protein (273,268), cerebrospinal fluid:plasma glucose (273,264), cerebrospinal fluid lactate (43,41), rifampicin dose (272,268), isoniazid dose (273,269), pyrazinamide dose (273,269), streptomycin dose (227,216), ethambutol dose (71,73).

† Smear positive=acid-fast bacilli seen by Ziehl–Neelsen stain of the cerebrospinal fluid; culture positive=*Mycobacterium tuberculosis* cultured from the cerebrospinal fluid.

**Table 2. Baseline Variables Independently Associated with Death, by Logistic Regression.\***

| Variable                                                                     | Hazard Ratio | 95% CI      | P Value |
|------------------------------------------------------------------------------|--------------|-------------|---------|
| Admission Glasgow coma score $\leq 10$                                       | 3.33         | 2.27–5.00   | <0.001  |
| HIV infection                                                                | 2.33         | 1.56–3.19   | <0.001  |
| Hemiplegia on entry to the study                                             | 1.66         | 1.11–2.49   | 0.014   |
| Previous tuberculosis treatment                                              | 2.15         | 1.39–3.34   | 0.001   |
| Extraneural/pulmonary tuberculosis                                           | 1.56         | 1.10–2.22   | 0.01    |
| Total CSF white cell count ( $\times 10^6/\text{ml}$ )                       | 0.99         | 0.998–0.999 | 0.02    |
| Cerebrospinal fluid:blood glucose ratio                                      | 5.27         | 1.63–16.98  | 0.005   |
| Hematocrit (%)                                                               | 0.96         | 0.94–0.99   | 0.002   |
| Adverse event requiring alteration in anti-tuberculosis drug dose or regimen | 2.44         | 1.56–3.81   | <0.001  |
| Treatment with placebo                                                       | 1.67         | 1.22–2.30   | 0.001   |

\* Variables were selected to the final model by a forward stepwise variable selection procedure with an entry significance level of 0.05. Five possible interactions within the model were examined and none were significant: treatment allocation and an adverse event ( $P=0.92$ ), HIV infection and an adverse event ( $P=0.44$ ), cerebrospinal fluid leucocyte count and cerebrospinal fluid:plasma glucose ( $P=0.81$ ), adverse event and hematocrit ( $P=0.25$ ), and previous tuberculosis treatment and HIV infection ( $P=0.48$ ).
